# Supplementary material for: Methylene blue sensitized photo Fenton-like reaction for rapid RAFT polymerization in aqueous solution
Source: Royal Society of Chemistry journal article supplement (doi:10.1039/d2py01436j), 2023-01-01
Supplement: d2py01436j1.pdf [file d2py01436j1.pdf]

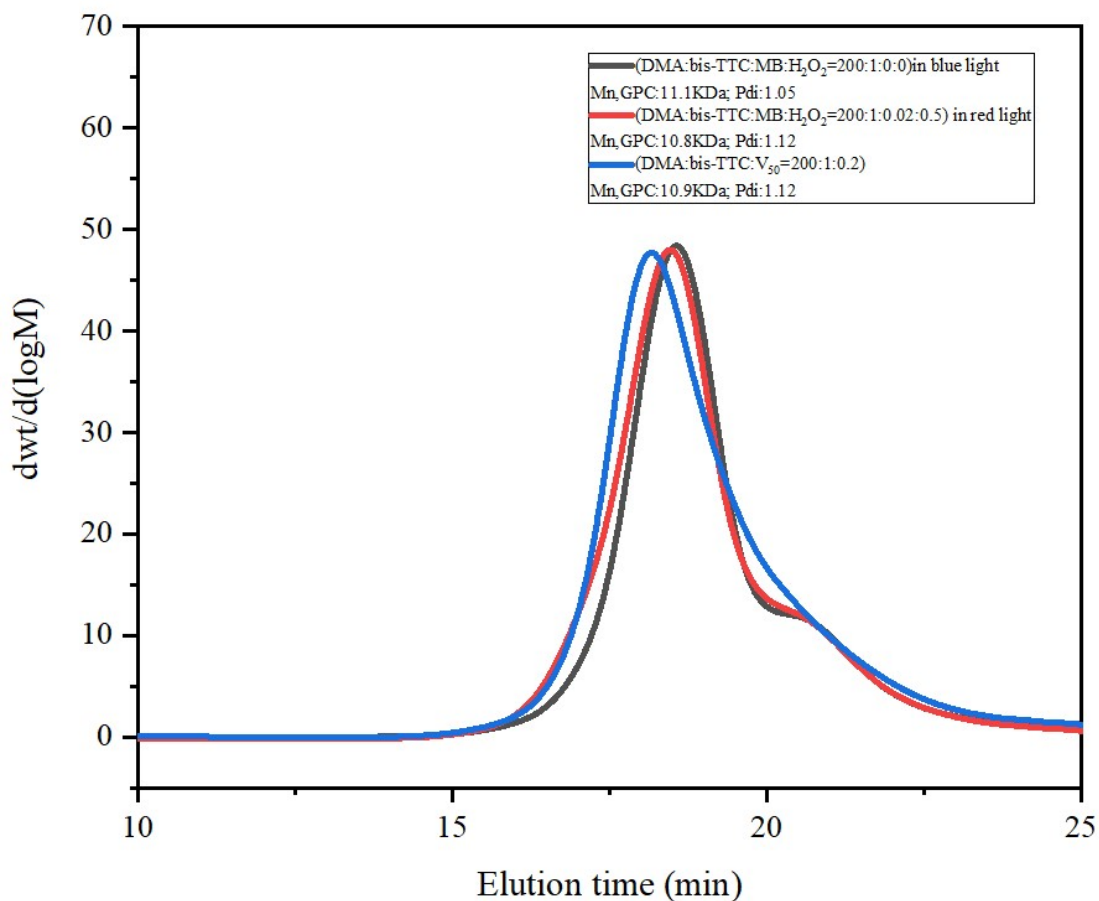

Fig S1 SEC traces of polymers obtained from different initiation routes: photo iniferter (black), photo Fenton reaction (red) and conventional initiator V50 (blue).

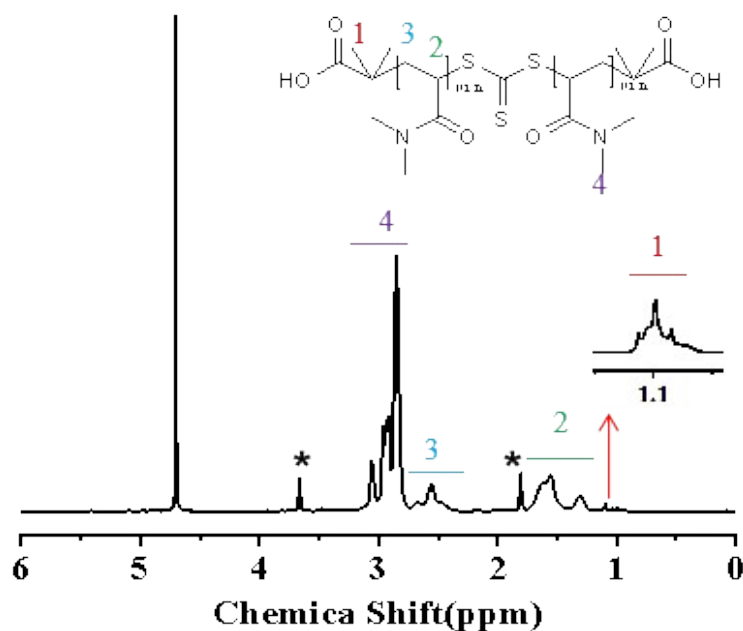

Fig. S2 <sup>1</sup>H-NMR spectrum of purified PDMA over photo fenton mediated aqueous RAFT polymerization

Table S1 effect of H<sub>2</sub>O<sub>2</sub> concentration on polymerization

| Entry | Monomer | DP  | bis-TTC/MB/H <sub>2</sub> O <sub>2</sub> | Time(min) | Conv.(%) | M <sub>n,GPC</sub> (KDa) | PDI  |
|-------|---------|-----|------------------------------------------|-----------|----------|--------------------------|------|
| 13    | DMA     | 200 | 1:0.02:0.05                              | 20        | 0        | 0                        | 0    |
| 14    | DMA     | 200 | 1:0.02:0.075                             | 20        | 56.5     | 7.6                      | 1.42 |
| 15    | DMA     | 200 | 1:0.02:0.3                               | 20        | 77.9     | 11.1                     | 1.24 |
| 16    | DMA     | 200 | 1:0.02:0.5                               | 20        | 97.8     | 16.5                     | 1.19 |
| 17    | DMA     | 200 | 1:0.02:1                                 | 20        | 99.4     | 16.9                     | 1.19 |

Table S2 effect of MB concentration on polymerization

| Entry | Monomer | DP  | bis-TTC/MB/H <sub>2</sub> O <sub>2</sub> | Time(min) | Conv.(%) | M <sub>n,GPC</sub> (KDa) | PDI  |
|-------|---------|-----|------------------------------------------|-----------|----------|--------------------------|------|
| 18    | DMA     | 200 | 1:0.001:0.5                              | 20        | 0        | 0                        | 0    |
| 19    | DMA     | 200 | 1:0.0025:0.5                             | 20        | 55       | 7.6                      | 1.28 |
| 20    | DMA     | 200 | 1:0.005:0.5                              | 20        | 80.5     | 10.7                     | 1.20 |
| 21    | DMA     | 200 | 1:0.01:0.5                               | 20        | 94.5     | 14.0                     | 1.22 |
| 22    | DMA     | 200 | 1:0.02:0.5                               | 20        | 97.8     | 16.5                     | 1.19 |
| 23    | DMA     | 200 | 1:0.03:0.5                               | 20        | 91.5     | 15.3                     | 1.19 |
| 24    | DMA     | 200 | 1:0.04:0.5                               | 20        | 81.2     | 12.7                     | 1.31 |
| 25    | DMA     | 200 | 1:0.05:0.5                               | 20        | 49.1     | 8.8                      | 1.29 |
| 26    | DMA     | 200 | 1:0.06:0.5                               | 20        | 22.1     | 3.5                      | 1.62 |
| 27    | DMA     | 200 | 1:0.07:0.5                               | 20        | 0        | 0                        | 0    |

Table S3 Details of Multiblock PDMA homopolymer

| Entry | Monomer | DP | bis-TTC:MB:H <sub>2</sub> O <sub>2</sub> | Time(min) | Conv.(%) | M <sub>n,GPC</sub> (Da) | PDI  |
|-------|---------|----|------------------------------------------|-----------|----------|-------------------------|------|
| 1     | DMA     | 50 | 1:0.03:1                                 | 40        | 99.6     | 2808                    | 1.48 |
| 2     | DMA     | 50 | 1:0.03:1                                 | 40        | 99.8     | 7687                    | 1.21 |
| 3     | DMA     | 50 | 1:0.03:1                                 | 40        | 96.1     | 11636                   | 1.26 |
| 4     | DMA     | 50 | 1:0.03:1                                 | 40        | 89.4     | 16793                   | 1.18 |
| 5     | DMA     | 50 | 1:0.03:1                                 | 40        | 89.6     | 20651                   | 1.3  |

Table S4 Details of PDMA-PNAM Multiblock polymer

| Entry | Monomer | DP | Bis-TTC:MB:H <sub>2</sub> O <sub>2</sub> | Time(min) | Conv.(%) | M <sub>n, GPC</sub> (Da) | PDI  |
|-------|---------|----|------------------------------------------|-----------|----------|--------------------------|------|
| 1     | DMA     | 50 | 1:0.03:1                                 | 40        | 97.1     | 3665                     | 1.22 |
| 2     | NAM     | 50 | 1:0.03:1                                 | 40        | 99.9     | 8865                     | 1.18 |
| 3     | DMA     | 50 | 1:0.03:1                                 | 40        | 95       | 14167                    | 1.17 |
| 4     | NAM     | 50 | 1:0.03:1                                 | 40        | 99.9     | 18765                    | 1.37 |
| 5     | DMA     | 50 | 1:0.03:1                                 | 40        | 80       | 23889                    | 1.47 |
